# Supplementary material for: Simplifying the calculation of light scattering properties for black carbon fractal aggregates
Source: Copernicus journal article supplement (doi:10.5194/acp-14-7825-2014), 2014-08-07
Supplement: Supplementary file 1 [file supplement-cover-letter.pdf › supplement-cover-letter.pdf]

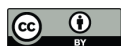

## *Supplement of*

# **Simplifying the calculation of light scattering properties for black carbon fractal aggregates**

**A. J. A. Smith and R. G. Grainger**

*Correspondence to:* A. J. A. Smith ([smith@atm.ox.ac.uk](mailto:smith@atm.ox.ac.uk))

- Supplement-Cover-Letter.pdf
- parameterisation\_BCFA
  - idl\_routines
    - \* asym\_parameterisation\_bcfa.pro
    - \* cext\_parameterisation\_bcfa.pro
    - \* ln\_parameterisation\_bcfa.pro
    - \* read\_parameterisation\_bcfa.pro
    - \* ssa\_parameterisation\_bcfa.pro
  - parameterisation\_BCFA.txt
